# Supplementary material for: Cytoglobin Silencing Promotes Melanoma Malignancy but Sensitizes for Ferroptosis and Pyroptosis Therapy Response
Source: MDPI journal article supplement (doi:10.3390/antiox11081548), 2022-08-10
Supplement: s1 [file s1]

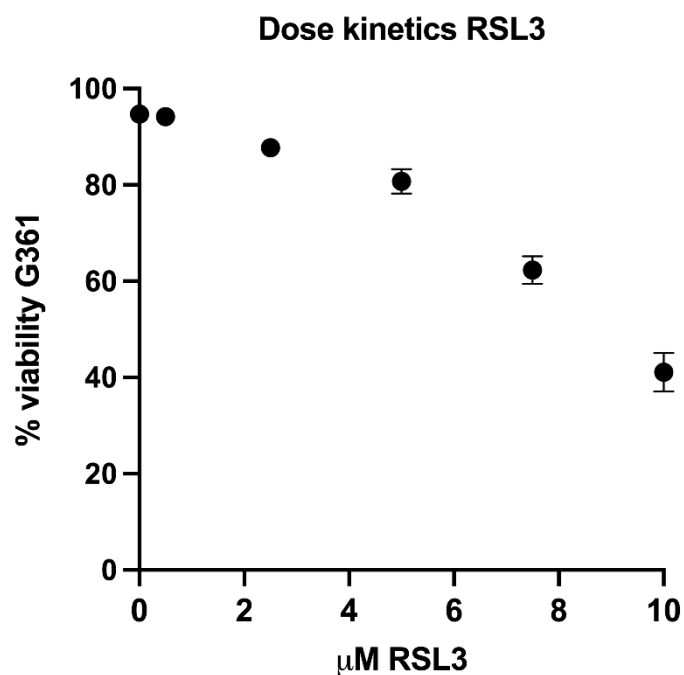

**Figure S1. Dose titration RSL3.** G361 cells were treated with different concentrations (0, 0.5, 2.5, 5, 7.5, 10  $\mu\text{M}$ ) of RSL3. Following propidium iodide (PI) staining, viability was measured 24 hours after treatment on the CytoFLEX flow cytometer.

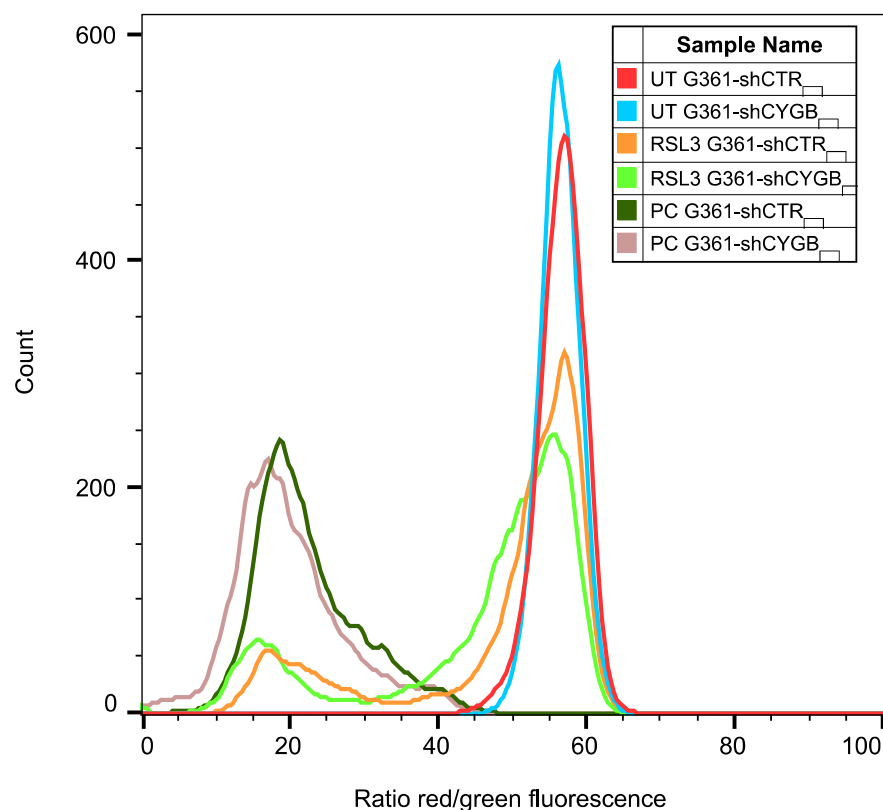

**Figure S2. Lipid peroxidation in G361 cells.** Lipid peroxidation measurements with Image-iT Lipid Peroxidation kit using flow cytometry. Lipid peroxidation Reagent is a ratiometric probe and the signal is detected on a flow cytometer with 488 nm laser excitation and fluorescence emission measured at 530/30 nm, and 532 nm laser excitation and fluorescence emission measured at 585/42 nm. The data are represented as the ratio of red/green fluorescence intensities. Ratios are higher in

untreated (UT) cell populations and upon treatment with 7.5  $\mu$ M RSL3 and cumene hydroperoxide (positive control; PC). A decrease in red/green fluorescence intensity ratios is visible because of the increase in green signal as a result of cumene hydroperoxide and RSL3 induced lipid peroxidation in G361-shCTR and G361-shCYGB cells.

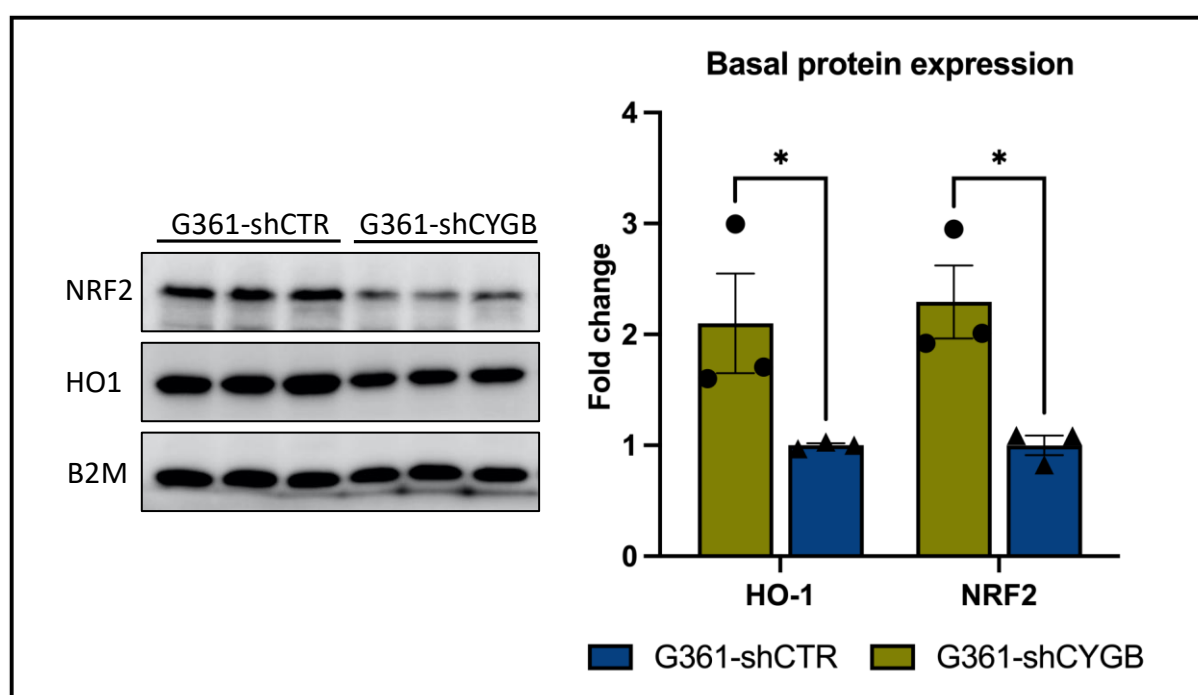

**Figure S3. Basal protein expression.** The protein expression of NRF2 and HO-1 was measured in G361-shCTR cells and G361-shCYGB melanoma cells. Quantification of the immunoblot signal showed that the knockdown of CYGB resulted in the decreased expression of NRF2 and HO-1. B2M was used as a loading control. Quantification is depicted as fold change compared to G361-shCYGB. Results are depicted as the mean with S.E.M of three independent experiments (n=3). Student's t-test (\* $p \leq 0.05$ ).

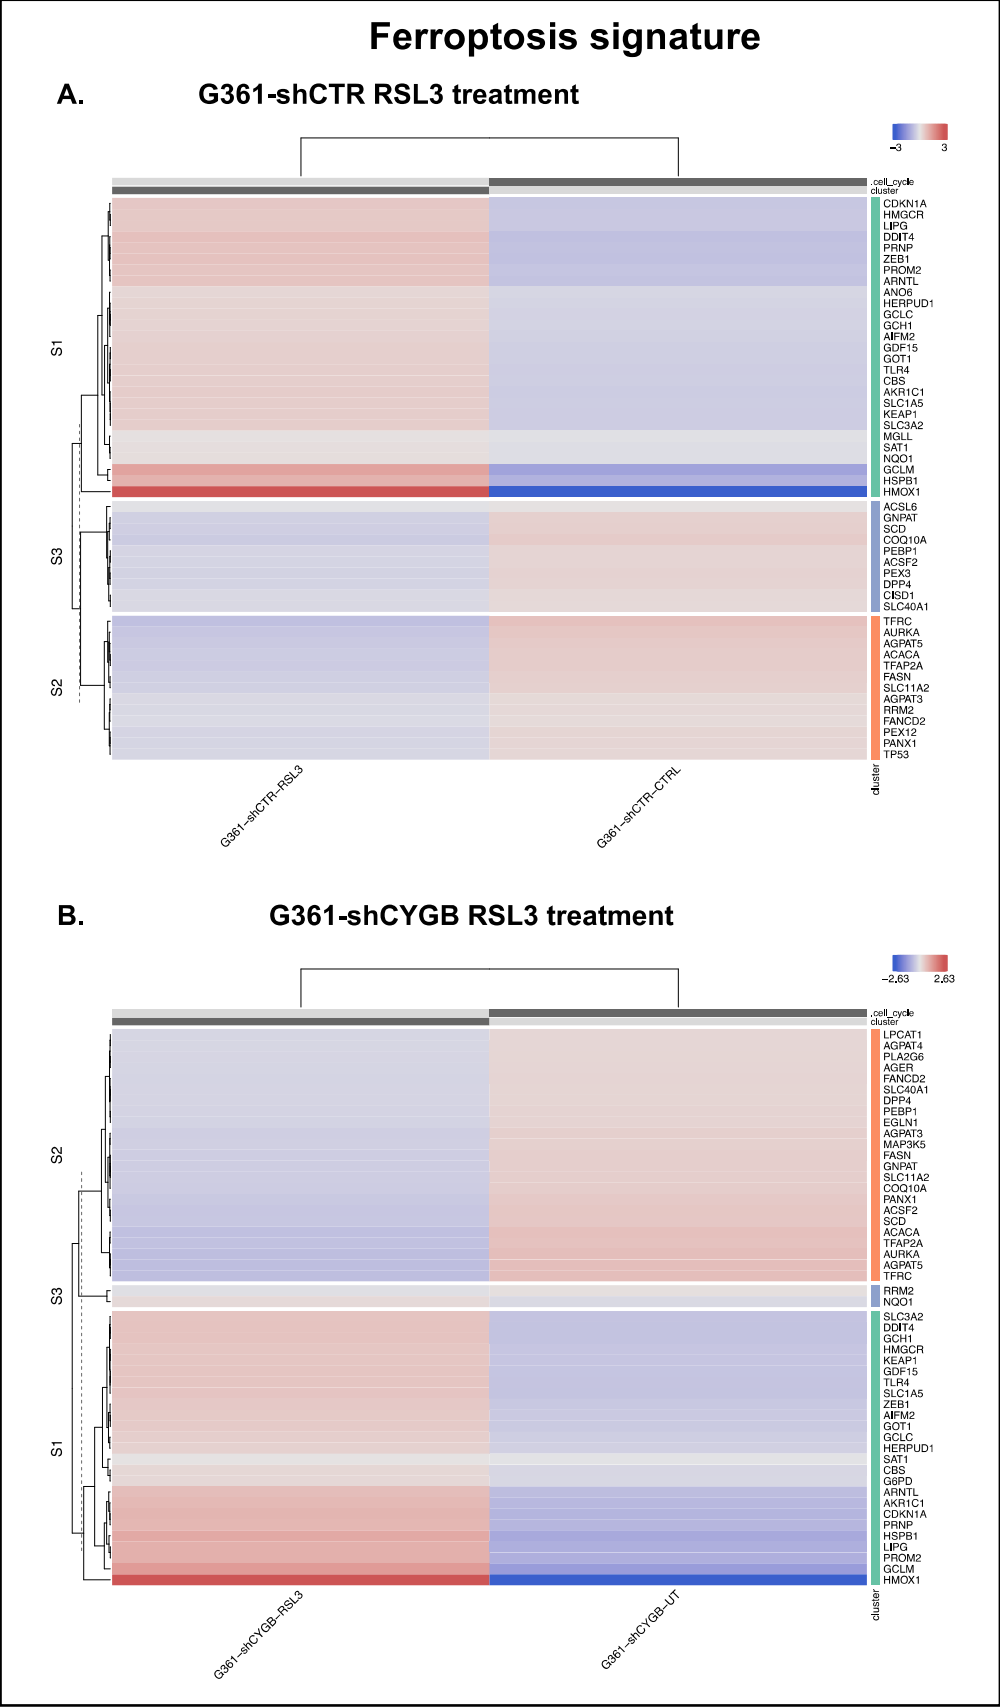

**Figure S4. Ferroptosis signature heatmap.** Hierarchical clustering of ferroptosis-related gene expression in (A) G361-shCTR and (B) G361-shCYGB upon RSL3 treatment. The top 50 ranked genes are represented.

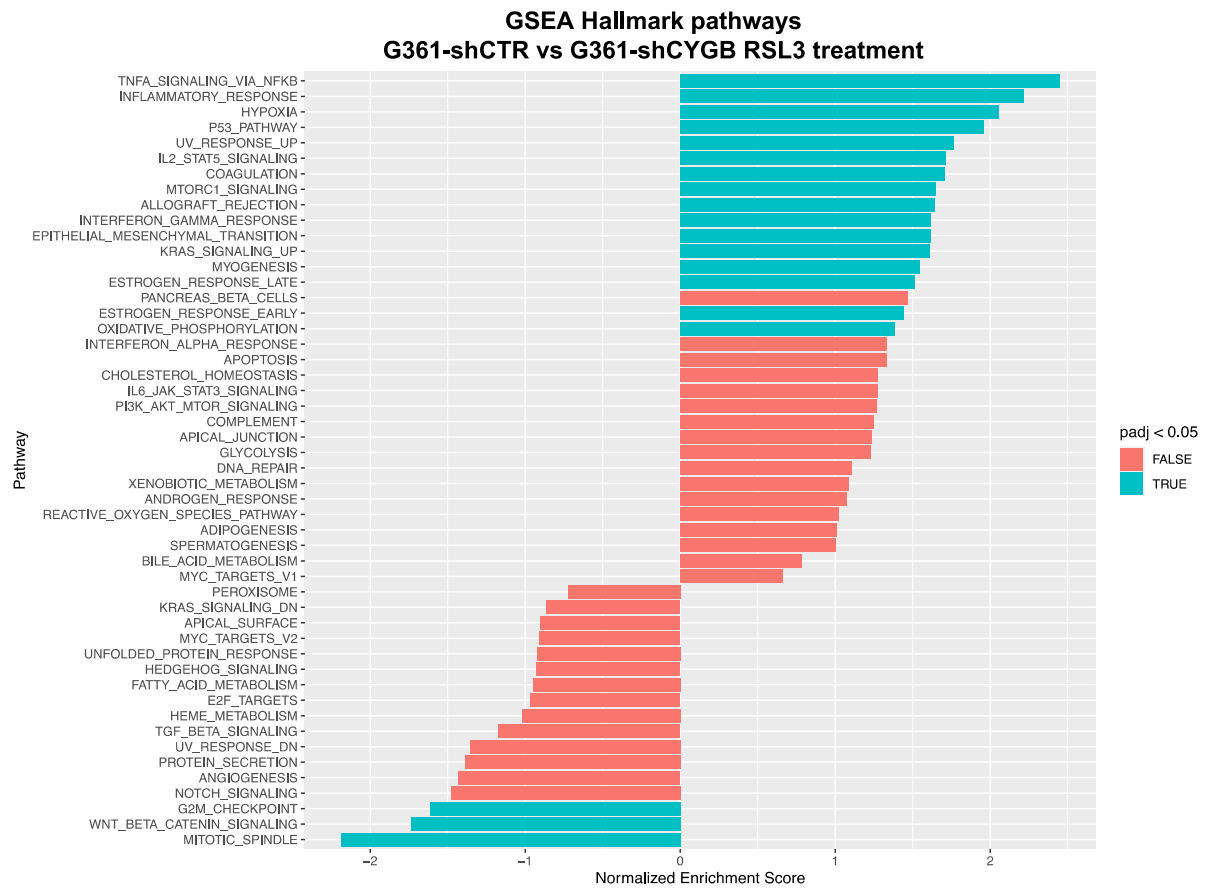

**Figure S5. Gene Set Enrichment Analysis.** Fast Gene Set Enrichment Analysis (fGSEA) using the hallmark pathway gene sets was performed on RSL3 treated G361-shCTR and G361-shCYGB melanoma cells.

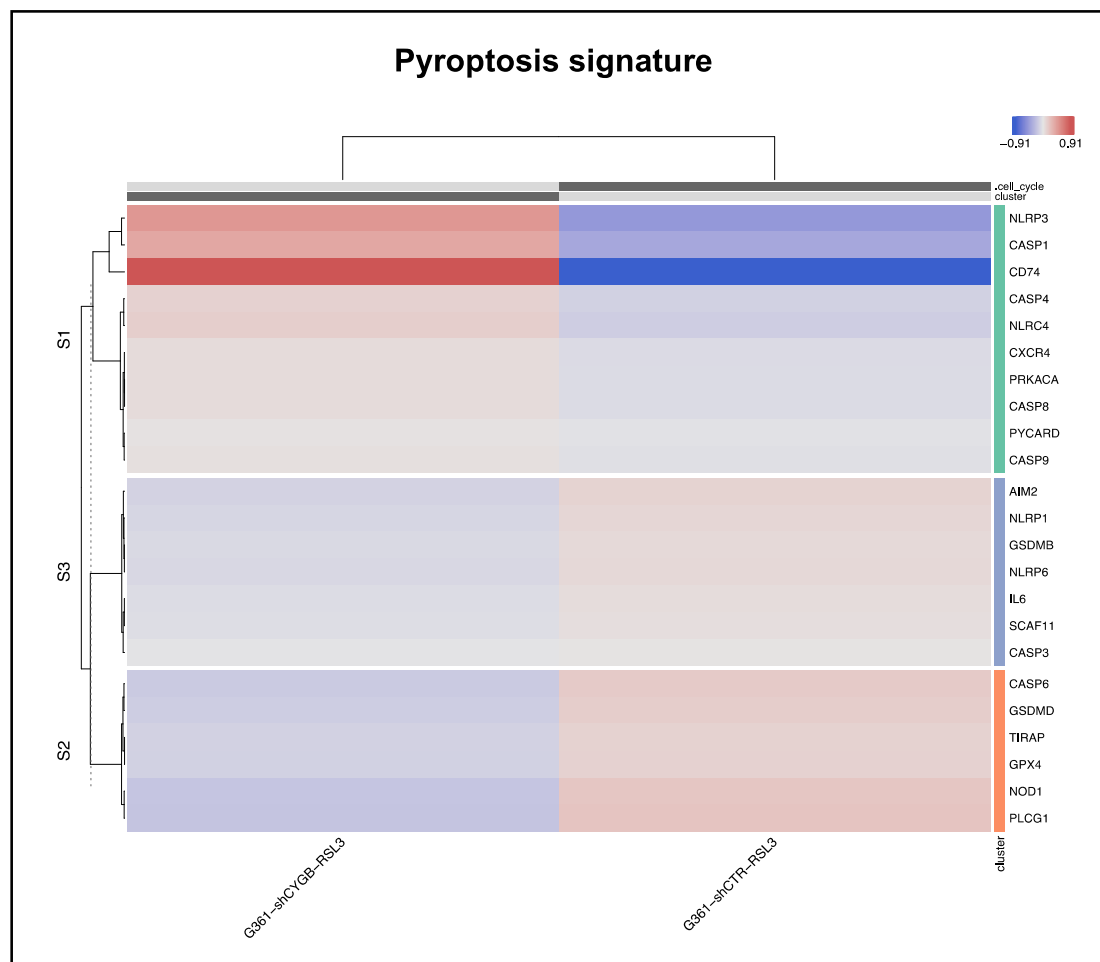

**Figure S6. Pyroptosis signature heatmap.** Hierarchical clustering of pyroptosis-related gene expression differences between RSL3 treated G361-shCTR and G361-shCYGB.

**Table S1.** Primer sequences of used genes

| Gene symbol           | Forward primer (5' to 3') | Reverse primer (5' to 3') |
|-----------------------|---------------------------|---------------------------|
| <b>Reference gene</b> |                           |                           |
| <i>B2M</i>            | TGCTGTCTCCATGTTTGATGTATCT | TCTCTGCTCCCCACCTCTAAGT    |
| <i>YWHAZ</i>          | ACTTTTGGTACATTGTGGCTTCAA  | CCGCCAGGACAAACCAGTAT      |
| <b>Target gene</b>    |                           |                           |
| <i>CXCR4</i>          | ACTACACCGAGGAAATGGGCT     | CCCACAATGCCAGTTAAGAAGA    |
| <i>CD74</i>           | GACGAGAACGGCAACTATCTG     | GTTGGGGAAGACACACCAGC      |
| <i>CASP1</i>          | TTTCCGCAAGGTTTCGATTTTCA   | GGCATCTGCGCTCTACCATC      |
| <i>SYK</i>            | TGCACTATCGCATCGACAAAG     | CATTTCCTGTGTGCCGATTT      |
| <i>NLRP3</i>          | GATCTTCGCTGCGATCAACAG     | CGTGCATTATCTGAACCCAC      |
